# Supplementary material for: Histone deacetylase 4 reverses cellular senescence via DDIT4 in dermal fibroblasts
Source: publisher site journal article supplement (doi:10.18632/aging.204118), 2022-06-09
Supplement: Supplementary file [file aging-v14i11-204118-supplementary-material-SD3.pdf]

**Supplementary Table 2. Sample information for public microarray datasets.**

| Senescence type                              | Paper                                                                                                                                                                       | GEO ID    | Sample accession | Sample name                           | Organism | Cell type                                                               | Treatment                               | Detail information for treatment                                                                                                                                                                                                                                                                                                                                                                                                                                                                                                                                                                                                                                        | Platform                                                    |
|----------------------------------------------|-----------------------------------------------------------------------------------------------------------------------------------------------------------------------------|-----------|------------------|---------------------------------------|----------|-------------------------------------------------------------------------|-----------------------------------------|-------------------------------------------------------------------------------------------------------------------------------------------------------------------------------------------------------------------------------------------------------------------------------------------------------------------------------------------------------------------------------------------------------------------------------------------------------------------------------------------------------------------------------------------------------------------------------------------------------------------------------------------------------------------------|-------------------------------------------------------------|
| UV-induced model                             |                                                                                                                                                                             | GSE60795  | GSM1488774       | UV sample1                            | Human    | Primary neonatal human dermal fibroblasts                               | ssUVR irradiation exposure              | The cells were exposed to 12 J/cm <sup>2</sup> ssUVR a single time on a modified Hand Foot II phototherapy instrument (National Biological Corporation, Beachwood, OH). This instrument was fitted with 8 UVA bulbs (HOUVALITE F24T12/BL/HO [PUVA], National Biological Corporation) that emit 95% UVA and 5% UVB. UVA intensity was measured with a UVX digital handheld radiometer using the UVX-36 UVA sensor (UVP, Upland, CA). UVB intensity was measured with an ILT1400 Photo detector using the SEL240 UVB sensor (International Light, Newburyport, MA). The cells recovered in fresh medium under normal culture conditions for 24 hours prior to collection. | [HuGene-1_0-st] Affymetrix GeneChip Human Exon 1.0 ST array |
| UV-induced model                             | Solar-simulated ultraviolet radiation induces histone 3 methylation changes in the gene promoters of matrix metalloproteinases 1 and 3 in primary human dermal fibroblasts. | GSE60795  | GSM1488775       | UV sample2                            | Human    | Primary neonatal human dermal fibroblasts                               | ssUVR irradiation exposure              | The cells were exposed to 12 J/cm <sup>2</sup> ssUVR a single time on a modified Hand Foot II phototherapy instrument (National Biological Corporation, Beachwood, OH). This instrument was fitted with 8 UVA bulbs (HOUVALITE F24T12/BL/HO [PUVA], National Biological Corporation) that emit 95% UVA and 5% UVB. UVA intensity was measured with a UVX digital handheld radiometer using the UVX-36 UVA sensor (UVP, Upland, CA). UVB intensity was measured with an ILT1400 Photo detector using the SEL240 UVB sensor (International Light, Newburyport, MA). The cells recovered in fresh medium under normal culture conditions for 24 hours prior to collection. | [HuGene-1_0-st] Affymetrix GeneChip Human Exon 1.0 ST array |
| UV-induced model                             |                                                                                                                                                                             | GSE60795  | GSM1488778       | Sham sample1                          | Human    | Primary neonatal human dermal fibroblasts                               | Sham exposure                           | A sham exposure group (0 J/cm <sup>2</sup> ssUVR). The cells recovered in fresh medium under normal culture conditions for 24 hours prior to collection.                                                                                                                                                                                                                                                                                                                                                                                                                                                                                                                | [HuGene-1_0-st] Affymetrix GeneChip Human Exon 1.0 ST array |
| UV-induced model                             |                                                                                                                                                                             | GSE60795  | GSM1488779       | Sham sample2                          | Human    | Primary neonatal human dermal fibroblasts                               | Sham exposure                           |                                                                                                                                                                                                                                                                                                                                                                                                                                                                                                                                                                                                                                                                         | [HuGene-1_0-st] Affymetrix GeneChip Human Exon 1.0 ST array |
| H <sub>2</sub> O <sub>2</sub> -induced model | Pan-senescence transcriptome analysis identified RRAD as a marker and negative regulator of cellular senescence                                                             | GSE116761 | GSM3260257       | H <sub>2</sub> O <sub>2</sub> sample1 | Human    | normal human fibroblasts (NHFs from circumsised foreskin of a juvenile) | H <sub>2</sub> O <sub>2</sub> treatment | The cells were treated in medium with H <sub>2</sub> O <sub>2</sub> for 2 h and kept in medium without H <sub>2</sub> O <sub>2</sub> for 48 h.                                                                                                                                                                                                                                                                                                                                                                                                                                                                                                                          | Arraystar Human LncRNA microarray V2.0                      |
| H <sub>2</sub> O <sub>2</sub> -induced model |                                                                                                                                                                             | GSE116761 | GSM3260258       | H <sub>2</sub> O <sub>2</sub> sample2 | Human    | normal human fibroblasts (NHFs from                                     | H <sub>2</sub> O <sub>2</sub> treatment |                                                                                                                                                                                                                                                                                                                                                                                                                                                                                                                                                                                                                                                                         | Arraystar Human LncRNA microarray V2.0                      |

|                                              |           |            |                                       |       |                                                                                                                |                                         |                                                              |                                        |
|----------------------------------------------|-----------|------------|---------------------------------------|-------|----------------------------------------------------------------------------------------------------------------|-----------------------------------------|--------------------------------------------------------------|----------------------------------------|
| H <sub>2</sub> O <sub>2</sub> -induced model | GSE116761 | GSM3260259 | H <sub>2</sub> O <sub>2</sub> sample3 | Human | circumcised foreskin of a juvenile)<br>normal human fibroblasts (NHF) from circumcised foreskin of a juvenile) | H <sub>2</sub> O <sub>2</sub> treatment |                                                              | Arraystar Human LncRNA microarray V2.0 |
| H <sub>2</sub> O <sub>2</sub> -induced model | GSE116761 | GSM3260260 | control sample1                       | Human | circumcised foreskin of a juvenile)<br>normal human fibroblasts (NHF) from circumcised foreskin of a juvenile) | normal NHFs                             |                                                              | Arraystar Human LncRNA microarray V2.0 |
| H <sub>2</sub> O <sub>2</sub> -induced model | GSE116761 | GSM3260261 | control sample2                       | Human | circumcised foreskin of a juvenile)<br>normal human fibroblasts (NHF) from circumcised foreskin of a juvenile) | normal NHFs                             | NHFs was cultured in DMEM supplemented with 10% FBS (Gibco). | Arraystar Human LncRNA microarray V2.0 |
| H <sub>2</sub> O <sub>2</sub> -induced model | GSE116761 | GSM3260262 | control sample3                       | Human | circumcised foreskin of a juvenile)<br>normal human fibroblasts (NHF) from circumcised foreskin of a juvenile) | normal NHFs                             |                                                              | Arraystar Human LncRNA microarray V2.0 |
